# Supplementary material for: Relativity of Energy
Source: Preprints.org preprint supplement (doi:10.20944/preprints202111.0559.v1), 2021-11-30
Supplement: Supplementary file 1 [file supplementary]

# To Editor (Moderator)

Dear Editor,

This work has been rejected by *Preprints* twice. The second time I did not get any reason, but the first time it was for *lack of enough references*. I would be glad if I could include more references but there is not any more, as my idea (subject of the submission) has never been considered before. The key idea is based on <https://arxiv.org/abs/1106.1568> which is not published anywhere else and whose proposal that I use appears in it for the first time, to the best of my knowledge. I checked the literature again and I could not find any other relevant reference.

I also have to mention that I have uploaded this submission on *ResearchGate* and *viXra* (both are **preprint** servers) as well.
